# Supplementary material for: Integrated Endotoxin-Adsorption and Antibacterial Properties of Platelet-Membrane-Coated Copper Silicate Hollow Microspheres for Wound Healing
Source: Research Square preprint supplement (doi:10.21203/rs.3.rs-903043/v1), 2021-09-22

A multifunctional antibacterial agent (CSO@PM) composed of a mesoporous copper silicate microsphere (CSO) core and a platelet membrane (PM) shell has been designed for bacteria-infected wound healing. CSO@PM can specifically target bonded bacteria, and combined with NIR radiation, exhibiting highly photothermal disruption to bacteria. Additionally, CSO@PM can adsorb endotoxins secreted by gram-negative bacteria, significantly alleviating inflammation, resulting in re-epithelialization and granulation-tissue formation, wound healing promoting.


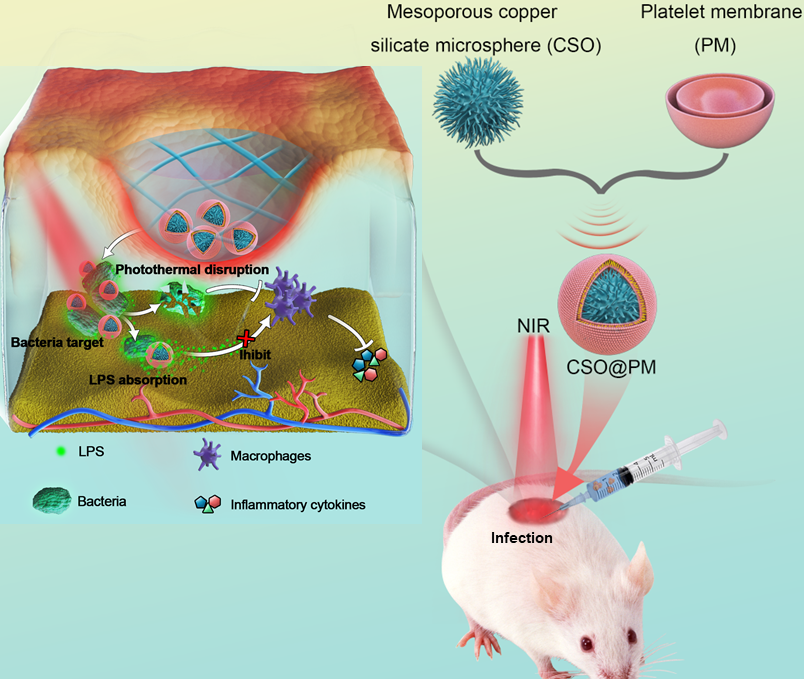

Supplement: Supplementary file 1 [file ee2b238bfd01070138644871.docx]
